# Supplementary material
Source: publisher figshare collection journal article supplement (https://geolsoc.figshare.com/ndownloader/files/16753925)
Supplement: Supplementary file 1 [file 16753925]

Figure 12 data -reservoir column heights from 27 faulted reservoirs (Seni et al. 1997)
Reservoir Location	Pool Depth (m TVDSS)	Column Height (m)
High Island Block 24L GP	-2426.8	30.5
West Cameron 66 HG	-1982.7	9.1
Brazos Area 446-L SE-4 4200 SD	-1260.0	228.6
Middle Bank Reef 6000 Reservoir	-2021.1	53.3
Block 440 B Sand FBB	-2476.5	109.7
Block 440 B Sand FBD	-2476.5	61.0
Eugene Island 24 1500	-4550.1	83.8
Vermilion Block 14 Cib Op	-3129.7	22.9
Matagorda Island 703 FT	-2727.0	61.0
South Marsh Island 241 B2	-2137.0	18.3
Matagorda Island 604 6550	-2041.2	48.8
Mustang Island 805 LMA1	-2861.5	126.5
Matagorda Island 527 E	-2774.6	106.7
Shipwreck L-1 Reservoir	-2526.5	91.4
Shipwreck L-1 Reservoir	-2526.5	21.3
Main Pass 73	-4076.7	48.8
Galveston 393 BH-15	-1866.9	12.2
Matagorda Island 4A 5050	-1523.7	18.3
Brazos 70A TW1	-2068.1	91.4
Sabine Pass 10 MP3	-3606.4	114.3
Mustang Island 31A 9700	-2777.9	132.0
West Cameron 68D	-4983.5	79.2
South Marsh Island 9	-4774.4	246.9
Mustang Island 31A MP4	-3636.3	152.4
OCS Matagorda Island 668 KQ	-3369.9	91.4
East Cameron 60 PQ	-4297.7	190.2
Vermilion Block 14 Rob Sands	-4030.7	38.1
Eugene Island 136 PP	-5730.2	143.3
Matagorda Island Block 668 11800 Sand	-3548.2	116.4
